# Supplementary material for: “Realization–Feedback” Path of Ecological Product Value in Rural Areas from the Perspective of Capital Recycling Theory: A Case Study of Zhengjiabang Village in Changyang County, China
Source: MDPI journal article supplement (doi:10.3390/su151813905), 2023-09-19
Supplement: s1 [file s1]

Table S1.

| Interview Time    | Interviewee                                       | Main Interview Content                                                                                                                                                                                                                                                                                                         | Way of Interview                  |
|-------------------|---------------------------------------------------|--------------------------------------------------------------------------------------------------------------------------------------------------------------------------------------------------------------------------------------------------------------------------------------------------------------------------------|-----------------------------------|
| 23 August 2022    | 22 villagers                                      | The development of Zhengjiabang Village.<br>The trades they are engaged in, their family situation, and their income.                                                                                                                                                                                                          | Meetings and individual dialogues |
| 24-26 August 2022 | 4 leaders of the village committee                | The history of Zhengjiabang Village.<br>Development of ecological products and links with the company and superiors.                                                                                                                                                                                                           | Individual dialogues              |
| 27 August 2022    | 2 leaders of the Longxing Tourism Service Company | Strategic positioning of the company.<br>The company's business steps and production value in Zhengjiabang Village.<br>The relationship between the company's industry and environmental management.<br>Company operations and development plans.                                                                              | Individual dialogues              |
| 10 October 2022   | 2 leaders of the Changyang County Committee       | Eco-industrial policy evolution, market mechanism and product innovation mechanism in Changyang County .<br>The path and mechanism of realizing the value of ecological products in Zhengjiabang Village.<br>Villagers' perception and recognition of village changes<br>Eco-environmental management in Zhengjiabang Village. | Individual dialogues              |
| 4 November 2022   | 1 leader of the village committee                 | Changes in perceptions of self-identity and local identity.<br>Industrialization process of ecological products.                                                                                                                                                                                                               | Individual dialogues              |
